# Supplementary material for: A CTNNA3 compound heterozygous deletion implicates a role for αT-catenin in susceptibility to autism spectrum disorder
Source: PubMed Central journal article supplement (PMC4104741; doi:10.1186/1866-1955-6-17), 2014-07-10
Supplement: 1866-1955-6-17-S1.pdf [file 1866-1955-6-17-S1.pdf]

### Alignment Maternal Deletion

Prox CCTATTTATTTTCTCACTGCTTTTCCTTCTGGAATTTCTAAACAGGAAT  
Del CCTATTTATTTTCTCACTGCTTTTCCTTCTGGAATTTCTAAACAGGAAT  
Dist CAATGCTTTACCATCATCTGCCAAAGACGTGTGTGCAAATATCAGTCTTG

Prox AGACTATTTGTTTGCATAGTGATATCCCATATGTCATGTAAACTTTTTTC  
Del AGACTATTTGTTTGCATAGTGATATGAGGCTAACCTGCCATCTGCTTAT  
Dist CAAACAGACAATATTTGCACTACATGAGGCTAACCTGCCATCTGCTTAT

Prox ATTTTTATTCTTTTTTCTTTTTTGCCTAATTCGCTTATTTCAAAGATC  
Del CAGATGTTTCGGAGTCCAAATTGTACAGTTTTCTTGTGTTTCCCCTAATG  
Dist CAGATGTTTCGGAGTCCAAATTGTACAGTTTTCTTGTGTTTCCCCTAATG

### Alignment Paternal Deletion

Prox GTGTAGGAACAGTACATAACAAGGCATCTTTTAAAGGACAGAGTATTT  
Del GTGTAGGAACAGTACATAACAAGGCATCTTTTAAAGGACAGAGTATTT  
Dist TATACTTCACATTTACAGTAATTACTATGGCTTTACTTTCATTTGCTTCT

Prox CCTGAACTACATATTAATGTTATTTAGACAGATTTTTTAAAGTTTGATA  
Del CCTGAACTACATATTAATGTTATTTAATATTAATGTTATTTAATATTTA  
Dist CTCAGTTTTCTTCATCTTGCAACAAGACA-----

Prox TGTACATCAATATAAAAATTTAAAAGGGAGTCATGGGTGGGGGAAATGGGA  
Del ATATCAAGAAAAAGCAGGTAGTAGGTAGCTTCTAACAGAAGAAGCAGACAA  
Dist --ATCAAGAAAAAGCAGGTAGTAGGTAGCTTCTAACAGAAGAAGCAGACAA

Prox AAATGCTGGTCAAGGTGTACAAAGTTTCATTTAGGTAGCA  
Del AAGAGAGCATAAAGAAGATATTAGCCAAGAAGTGATGCTT  
Dist AAGAGAGCATAAAGAAGATATTAGCCAAGAAGTGATGCTT
