# Supplementary material for: A CTNNA3 compound heterozygous deletion implicates a role for αT-catenin in susceptibility to autism spectrum disorder
Source: PubMed Central journal article supplement (PMC4104741; doi:10.1186/1866-1955-6-17), 2014-07-10

## Control 1

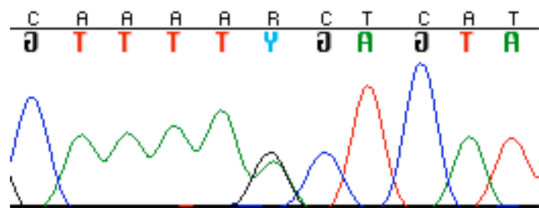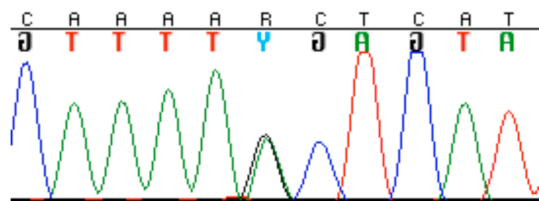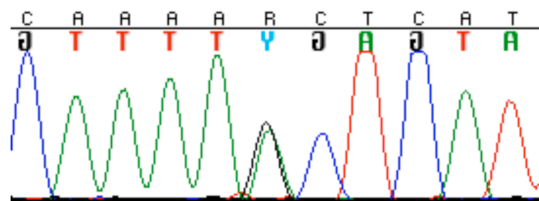

## Control 2

gDNA

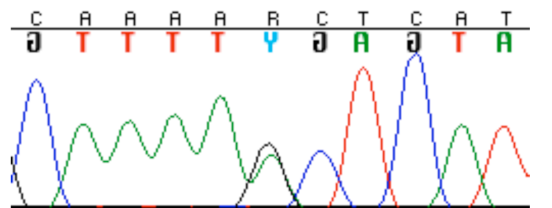Cortex  
cDNA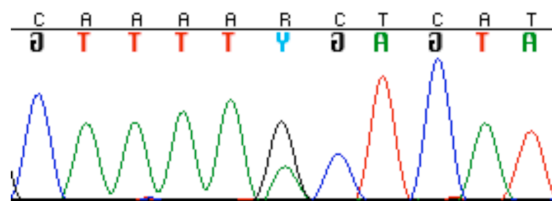Cerebellum  
cDNA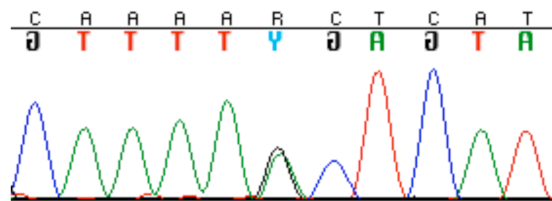

Supplement: 1866-1955-6-17-S3.pdf [file 1866-1955-6-17-S3.pdf]
